# Supplementary material for: Outcomes in High-Risk Pulmonary Embolism Patients Undergoing FlowTriever Mechanical Thrombectomy or Other Contemporary Therapies: Results From the FLAME Study
Source: PubMed Central journal article supplement — Circ Cardiovasc Interv. 2023 Oct 17;16(10):e013406. doi: 10.1161/CIRCINTERVENTIONS.123.013406 (PMC10573120; doi:10.1161/circinterventions.123.013406), 2023-10-17
Supplement: hcv-16-e013406-s001.pdf [file hcv-16-e013406-s001.pdf]

**SUPPLEMENTAL MATERIAL**

**Outcomes in High-risk Pulmonary Embolism Patients Undergoing FlowTrierer  
Mechanical Thrombectomy or Other Contemporary Therapies:  
Results from the FLAME Study**

## Table of Contents

|                                                                                                                                      |    |
|--------------------------------------------------------------------------------------------------------------------------------------|----|
| 1. Supplemental Methods.....                                                                                                         | 3  |
| 1.1 The FlowTrieve System Procedure Details .....                                                                                    | 3  |
| 1.2 Eligibility Criteria and Primary Endpoint Component Definitions .....                                                            | 3  |
| Table S1. Inclusion and Exclusion Criteria.....                                                                                      | 3  |
| Table S2. Definitions .....                                                                                                          | 4  |
| 1.3 Meta-Analysis Methods and Derivation of Performance Goal.....                                                                    | 4  |
| Table S3. Studies included in Performance Goal Derivation.....                                                                       | 5  |
| Table S4. Demographics, Medical History, and Clinical Presentation Reported in Studies included in Performance Goal Derivation ..... | 7  |
| 1.4 Sample Size Calculation and Early Stopping Criteria for Success .....                                                            | 8  |
| 2. Supplemental Results.....                                                                                                         | 9  |
| 2.1 Interim Analysis Results .....                                                                                                   | 9  |
| Table S5. Interim Analysis Results.....                                                                                              | 9  |
| 2.2 Enrollment Flow .....                                                                                                            | 9  |
| Figure S1. Enrollment Flow for High-risk Patients in the FLAME Study .....                                                           | 9  |
| 2.3 Prior Therapy Arm.....                                                                                                           | 9  |
| 2.4 All-cause Mortality Stratified by SCAI Shock Stage .....                                                                         | 10 |
| Table S6. All-cause Mortality Stratified by SCAI Shock Stage: FlowTrieve Arm.....                                                    | 10 |
| Table S7. All-cause Mortality Stratified by SCAI Shock Stage: Context Arm .....                                                      | 10 |
| 2.5 Additional Secondary Endpoints and Serious Adverse Event Incidence.....                                                          | 11 |
| Table S8. Additional Secondary Endpoints and Serious Adverse Event Incidence: FlowTrieve Arm .....                                   | 11 |
| Table S9. Additional Secondary Endpoints and Serious Adverse Event Incidence: Context Arm ....                                       | 12 |
| 2.6 Most Common Device-related Complications.....                                                                                    | 13 |
| Table S10. Most Common Device-related Complications: FlowTrieve Arm.....                                                             | 13 |
| Table S11. Most Common Device-related Complications: Context Arm .....                                                               | 13 |
| 2.7 Listing of Serious Adverse Events Related to the Primary Treatment Device or Therapy.....                                        | 14 |
| Table S12. Listing of Serious Adverse Events Related to the Primary Treatment Device or Therapy: FlowTrieve Arm .....                | 14 |
| Table S13. Listing of Serious Adverse Events Related to the Primary Treatment Device or Therapy: Context Arm.....                    | 15 |

## 1. Supplemental Methods

### 1.1 The FlowTriever System Procedure Details

Treatment with the FlowTriever System could include use of the Triever aspiration catheter (16F, 20F, 24F) or the FlowTriever catheter for mechanical thrombus dislodgement and removal, or both, as previously described.<sup>15</sup> Following venous access, the Triever catheter is advanced over a 0.035” guidewire across the right heart to the pulmonary arteries. Volume-controlled aspiration is performed using a 60-cc large-bore syringe and repeated as needed. The FlowTriever Catheter may be used to engage the thrombus with self-expanding nitinol disks. Blood return using the FlowSaver Blood Return System (Inari Medical, Irvine, CA) could be used.

### 1.2 Eligibility Criteria and Primary Endpoint Component Definitions

**Table S1. Inclusion and Exclusion Criteria**

|                    |                                                                                                                                                                                                                                                                                                                                                                                                           |
|--------------------|-----------------------------------------------------------------------------------------------------------------------------------------------------------------------------------------------------------------------------------------------------------------------------------------------------------------------------------------------------------------------------------------------------------|
| Inclusion Criteria |                                                                                                                                                                                                                                                                                                                                                                                                           |
| Inclusion Criteria | ≥18 years of age                                                                                                                                                                                                                                                                                                                                                                                          |
|                    | Treatment team determined high-risk PE was cause of shock                                                                                                                                                                                                                                                                                                                                                 |
|                    | One or more of the following criteria: <ul style="list-style-type: none"> <li>• Systolic blood pressure &lt;90 mmHg for at least 15 minutes or systolic blood pressure decrease of &gt;40 mmHg for at least 15 minutes</li> <li>• Need for vasopressor support</li> <li>• Resuscitation after cardiac arrest with &lt;30 minutes of cardiopulmonary resuscitation and Glasgow Coma scale &gt;8</li> </ul> |
| Exclusion Criteria | Out-of-hospital cardiac arrest with Glasgow Coma Scale ≤8                                                                                                                                                                                                                                                                                                                                                 |
|                    | Witnessed cardiac arrest with ongoing cardiopulmonary resuscitation ≥30 minutes                                                                                                                                                                                                                                                                                                                           |
|                    | Contraindication to anticoagulants                                                                                                                                                                                                                                                                                                                                                                        |
|                    | Hematocrit <28%                                                                                                                                                                                                                                                                                                                                                                                           |
|                    | Platelet count <25,000/μL                                                                                                                                                                                                                                                                                                                                                                                 |
|                    | International normalized ratio (INR) >8                                                                                                                                                                                                                                                                                                                                                                   |
|                    | Intracardiac thrombus or clot in transit                                                                                                                                                                                                                                                                                                                                                                  |
|                    | Known anaphylactic sensitivity to radiographic agents that cannot be pre-treated                                                                                                                                                                                                                                                                                                                          |
|                    | History of pulmonary hypertension with systolic pulmonary arterial pressure >70 mmHg                                                                                                                                                                                                                                                                                                                      |
|                    | Presence of chronic medical conditions with estimated <90 days of life expectancy per physician discretion and not including the current PE                                                                                                                                                                                                                                                               |
|                    | Current participation in another drug or device treatment study that would interfere with participation in FLAME                                                                                                                                                                                                                                                                                          |
|                    | Current active COVID-19                                                                                                                                                                                                                                                                                                                                                                                   |

**Table S2. Definitions**

| <b>Primary Endpoint Component</b>                 | <b>Definition</b>                                                                                                                                                                                                                                                                                                                     |
|---------------------------------------------------|---------------------------------------------------------------------------------------------------------------------------------------------------------------------------------------------------------------------------------------------------------------------------------------------------------------------------------------|
| All-cause mortality                               | All-cause mortality through hospital discharge.                                                                                                                                                                                                                                                                                       |
| Bailout to an alternate thrombus removal strategy | The need for mechanical circulatory support or another thrombus removal strategy after the primary treatment strategy was initiated. The additional treatment strategy was not an <i>a priori</i> part of the original treatment plan.                                                                                                |
| Clinical deterioration                            | The new need for cardiopulmonary resuscitation (CPR), starting intravenous vasopressors to keep systolic blood pressure >90 mmHg in a previously normotensive patient, mechanical ventilation in a previously spontaneously breathing patient, or noninvasive positive pressure ventilation in a patient previously on nasal cannula. |
| Major bleeding                                    | 3b, 3c, 5a, or 5b on the Bleeding Academic Research Consortium (BARC) scale.                                                                                                                                                                                                                                                          |

### 1.3 Meta-Analysis Methods and Derivation of Performance Goal

The composite primary endpoint for the FlowTrier Arm was compared to a historical performance goal derived from a subset of 18 published studies (Table S3) from a recent systematic review and meta-analysis of high-risk PE outcomes.<sup>4</sup> Each of the 18 studies reported outcomes pertaining to at least 1 of the composite primary endpoint components and were therefore included in the development of the performance goal. The systematic review and meta-analysis were prospectively defined, compliant with PRISMA (Preferred Reporting Items for Systematic Reviews and Meta-Analyses) guidelines, and registered with PROSPERO (International Prospective Register of Systematic Reviews; CRD42020219695). Full methodological details and results of the systematic review and meta-analysis have been previously described.<sup>4</sup> Reported event rates in high-risk PE patients were averaged using a random-effects model to obtain the individual component rates for the composite performance goal calculation: in-hospital all-cause mortality (29.5%; 95% CI: 20.6%-37.9%), bailout to an alternate thrombus removal strategy (30.3%; 95% CI: 15.5%-50.7%), clinical deterioration (15.6%; 95% CI: 6.7%-32.5%), and BARC 3b/3c/5a/5b major bleeding (11.5%; 95% CI: 6.0%-21.0%) (Table S2). The performance goal was established at 32.0% by averaging the meta-analytic rates of the 4 individual primary endpoint components, rounding up to the nearest percent, and adding a 10% margin. A one-sided binomial proportion test with normal approximation and  $\alpha = 0.05$  was used to compare the primary endpoint to the performance goal.

**Table S3. Studies included in Performance Goal Derivation**

| Reference                        | Study Type                 | Subjects        | In-hospital all-cause mortality | Bailout to alternate thrombus removal strategy | Clinical deterioration (within 24 hours) | Major Bleeding (BARC 3b/3c/5a/5b) |
|----------------------------------|----------------------------|-----------------|---------------------------------|------------------------------------------------|------------------------------------------|-----------------------------------|
| Avgerinos 2018 <sup>16</sup>     | Retrospective              | 90              | 15/90, 16.6%                    | NS                                             | NS                                       | 24/90, 26.6%                      |
| Barrett 2010 <sup>17</sup>       | Retrospective              | SE: 9           | 6/9, 66.6%                      | NS                                             | NS                                       | NS                                |
|                                  |                            | TL: 10          | 6/10, 60.0%                     |                                                |                                          |                                   |
|                                  |                            | AC: 14          | 5/14, 35.7%                     |                                                |                                          |                                   |
| Carvalho 2010 <sup>18</sup>      | Retrospective              | 16              | 7/16, 43.8%                     | NS                                             | NS                                       | NS                                |
| Cho 2016 <sup>19</sup>           | Retrospective              | TL: 19          | NS                              | 4/19, 21.0%                                    | NS                                       | NS                                |
|                                  |                            | SE: 26          |                                 | NS                                             |                                          |                                   |
| de Winter 2019 <sup>20</sup>     | Retrospective              | 33              | NS                              | 8/33, 24.2%                                    | NS                                       | NS                                |
| George 2018 <sup>21</sup>        | Retrospective              | 32              | 15/32, 46.9%                    | NS                                             | 5/32, 15.6%                              | NS                                |
| Kuo 2015 <sup>22</sup>           | Prospective, observational | 28              | 4/28, 14.3%                     | NS                                             | NS                                       | 0/28, 0.0%                        |
| Minakawa 2018 <sup>23</sup>      | Retrospective              | 63              | 23/63, 36.5%*                   | NS                                             | NS                                       | NS                                |
| Moon 2018 <sup>24</sup>          | Retrospective              | Without ECMO: 9 | 7/9, 77.8%                      | NS                                             | NS                                       | NS                                |
|                                  |                            | ECMO: 14        | 8/14, 57.1%                     |                                                |                                          |                                   |
| Munakata 2012 <sup>25</sup>      | Retrospective              | 10              | 3/10, 30.0%†                    | NS                                             | NS                                       | 2/10, 20.0%                       |
| Neely 2015 <sup>26</sup>         | Retrospective              | 49              | 5/49, 10.2%*                    | NS                                             | NS                                       | 1/49, 2.0%                        |
| Pasrija 2018 <sup>27</sup>       | Retrospective              | SE: 27          | 5/27, 18.5%                     | NS                                             | NS                                       | 3/27, 11.1%                       |
|                                  |                            | SE/ECMO: 29     | 1/29, 3.4%                      |                                                |                                          | 4/29, 13.8%                       |
| Secemsky 2018 <sup>1</sup>       | Prospective, observational | 46              | 15/46, 32.6%                    | NS                                             | NS                                       | 11/46, 23.9%                      |
| Senturk 2016 <sup>28</sup>       | Prospective, observational | 186             | NS                              | NS                                             | NS                                       | 10/186, 5.4%                      |
| Sharifi 2016 <sup>29</sup>       | Prospective, observational | 23              | 2/23, 8.7%                      | NS                                             | NS                                       | 0/23, 0.0%                        |
| Shiomi 2017 <sup>30</sup>        | Retrospective              | 31              | 4/31, 12.9%                     | NS                                             | NS                                       | NS                                |
| Ucar 2013 <sup>31</sup>          | Retrospective              | 107             | 18/107, 16.8%                   | NS                                             | NS                                       | 4/107, 3.7%                       |
| Wang 2015 <sup>32</sup>          | Prospective, randomized    | TL group 1: 20  | NS                              | 12/20, 60.0%                                   | NS                                       | NS                                |
|                                  |                            | TL group 2: 20  |                                 | 4/20, 20.0%                                    |                                          |                                   |
| <b>Total</b>                     |                            | <b>911</b>      | <b>149/607</b>                  | <b>28/92</b>                                   | <b>5/32</b>                              | <b>66/609</b>                     |
| <b>Weighted Average [95% CI]</b> |                            |                 | <b>28.5% [20.6%, 37.9%]</b>     | <b>30.3% [15.5%, 50.7%]</b>                    | <b>15.6% [6.7%, 32.5%]</b>               | <b>11.5% [6.0%, 21.0%]</b>        |

Studies shown are a subset of a systematic review and meta-analysis published separately.<sup>4</sup> These studies reported data for one or more of the primary endpoint components and, therefore, were used to determine the performance goal. The weighted averages were calculated using a random-effects model. AC, anticoagulation; BARC, Bleeding Academic Research Consortium; ECMO, extracorporeal membrane oxygenation; NA, not applicable; NS, not specified; SE, surgical embolectomy; TL, thrombolytic therapy.

\*Operative mortality was reported. Only patients in refractory shock were included in the analysis.

†All patients died within 15 hours of the procedure.

**Table S4. Demographics, Medical History, and Clinical Presentation Reported in Studies included in Performance Goal Derivation**

| Available Data from 18 Meta-analyzed Studies (N=911)                        |                           |                    |                                       |
|-----------------------------------------------------------------------------|---------------------------|--------------------|---------------------------------------|
|                                                                             | Value from available data | Pooled sample size | Number of studies with data available |
| Age, years                                                                  | 60.3                      | n=495              | 13                                    |
| Female                                                                      | 55.6%                     | n=495              | 13                                    |
| BMI, kg/m <sup>2</sup>                                                      | 31.2                      | n=144              | 5                                     |
| <b>Race</b>                                                                 |                           |                    |                                       |
| American Indian or Alaskan Native                                           | NR                        |                    |                                       |
| Asian                                                                       | NR                        |                    |                                       |
| Black or African American                                                   | 35.7%                     | n=56               | 1                                     |
| Native Hawaiian or Pacific Islander                                         | NR                        |                    |                                       |
| White                                                                       | 68.2%                     | n=88               | 2                                     |
| Other                                                                       | NR                        |                    |                                       |
| Not provided                                                                | NR                        |                    |                                       |
| <b>History</b>                                                              |                           |                    |                                       |
| Congestive Heart Failure                                                    | 4.7%                      | n=258              | 5                                     |
| Chronic Obstructive Pulmonary Disease                                       | 9.5%                      | n=242              | 4                                     |
| Systemic Hypertension                                                       | 42.2%                     | n=348              | 8                                     |
| Pulmonary Hypertension                                                      | NR                        |                    |                                       |
| Diabetes Mellitus                                                           | 21.6%                     | n=348              | 8                                     |
| Cancer                                                                      | 19.2%                     | n=454              | 11                                    |
| Pulmonary Embolism                                                          | 12.5%                     | n=16               | 1                                     |
| Deep Vein Thrombosis                                                        | 48.4%                     | n=273              | 6                                     |
| Contraindication to thrombolytics                                           | 59.7%                     | n=124              | 4                                     |
| Prior COVID-19                                                              | NR                        |                    |                                       |
| <b>Clinical Presentation at Admission or Time of High-risk PE Diagnosis</b> |                           |                    |                                       |
| SCAI shock stage                                                            | NR                        |                    |                                       |
| Systolic BP, mmHg                                                           | 97.2                      | n=163              | 2                                     |
| Diastolic BP, mmHg                                                          | 57.0                      | n=107              | 1                                     |
| Heart Rate, bpm                                                             | 117.9                     | n=76               | 2                                     |
| Tachycardia, >100 bpm                                                       | 66.7%                     | n=69               | 2                                     |
| Respiration Rate, breaths/min                                               | 27.5                      | n=56               | 1                                     |
| Peripheral O <sub>2</sub> Sat (SpO <sub>2</sub> ), %                        | NR                        |                    |                                       |
| <b>Supplemental O<sub>2</sub></b>                                           |                           |                    |                                       |
| Nasal cannula                                                               | NR                        |                    |                                       |
| Face mask                                                                   | NR                        |                    |                                       |
| Intubated                                                                   | 47.1%                     | n=87               | 2                                     |
| Hypotension*                                                                | 80.4%                     | n=112              | 3                                     |
| Need for vasopressor support                                                | 57.5%                     | n=87               | 2                                     |
| Resuscitation after cardiac arrest**                                        | 42.7%                     | n=351              | 11                                    |
| Lactate ≥2 mmol/L                                                           | NR                        |                    |                                       |
| RV/LV Ratio                                                                 | 1.33                      | n=55               | 2                                     |
| Location of PE                                                              | NR                        |                    |                                       |

Presented as weighted averages or percentages.

\*Hypotension defined as systolic BP <90 mmHg, systolic BP <100 mmHg or a decline of >40 mmHg, or sustained (>15 minutes) systolic BP <90 mmHg.

\*\*Includes in-hospital and out-of-hospital cardiac arrest or resuscitation.

BMI, body mass index; BP, blood pressure; LV, left ventricle; NR, not reported; PE, pulmonary embolism; RV, right ventricle; SCAI, Society for Cardiovascular Angiography and Interventions.

Table S4 reports all pooled data available on demographic, medical history, and clinical presentation details from the 18 meta-analyzed studies included in Table S3 that informed the derivation of the performance goal. Many variables were not systematically reported for high-risk PE patients in these studies. Due to this high degree of missingness, there is low confidence that the pooled data is reflective of the overall population of high-risk PE patient included in the 18 meta-analyzed studies. These results are furnished for informational purposes only to partially contextualize the characteristics of high-risk PE patients included in the meta-analyzed studies.

#### **1.4 Sample Size Calculation and Early Stopping Criteria for Success**

The maximum sample size of 71 FlowTrievers Arm patients was calculated using a two-stage group sequential design, where the in-hospital composite primary endpoint of all-cause mortality, bailout to an alternate thrombus removal strategy, clinical deterioration, and major bleeding (BARC 3b/3c/5a/5b) was expected to occur in 18% of FlowTrievers Arm patients, based on the consensus from a steering committee of expert clinicians. This expected frequency of the primary endpoint in the FlowTrievers Arm was compared to the historical performance goal, which was established at 32.0% by averaging the rates of the 4 individual primary endpoint components from the meta-analysis shown in Table S3, rounding up to the nearest percent, and adding a 10% margin. A one-sided binomial proportion test with normal approximation was used against the historical performance goal with a power of 80% and  $\alpha = 0.05$ . The O'Brien-Fleming method was implemented to determine the early stopping boundary for 50 subjects enrolled in the FlowTrievers Arm. This interim analysis constitutes the first stage of the design, while the second stage is the final analysis performed at  $N = 71$  FlowTrievers Arm subjects.

At the final analysis of 71 FlowTrievers Arm subjects, the  $Z$ -score threshold was  $-1.7116$  and the  $P$  value threshold was  $0.0435$  for success, meaning that a maximum of 16 patients out of 71 patients could reach the primary endpoint in order for the study to succeed. While the protocol specified a maximum sample size of 71 FlowTrievers Arm patients, the study was stopped after the interim analysis stopping criterion was reached at 50 FlowTrievers Arm patients enrolled. At the interim analysis, the  $Z$ -score threshold was  $-2.0311$  and the  $P$  value threshold was  $0.0211$  for success. The interim analysis was intended to determine whether the study should be stopped early due to success. There was no futility threshold specified for the interim analysis.



## 2. Supplemental Results

### 2.1 Interim Analysis Results

**Table S5. Interim Analysis Results**

|                  | <b>FlowTriever Arm<br/>(Interim analysis<br/>population,<br/>n = 50)</b> | <b>Performance Goal</b> | <b>P value</b> |
|------------------|--------------------------------------------------------------------------|-------------------------|----------------|
| Primary endpoint | 9 (18.0%)                                                                | 32.0%                   | 0.0169*        |

\*The pre-specified interim analysis was performed after 50 FlowTriever patients were enrolled to determine whether the study should be stopped early due to success. The primary endpoint analysis met the pre-specified criterion for early stoppage of the study, having achieved  $P < 0.0211$ .

### 2.2 Enrollment Flow

**Figure S1. Enrollment Flow for High-risk Patients in the FLAME Study**

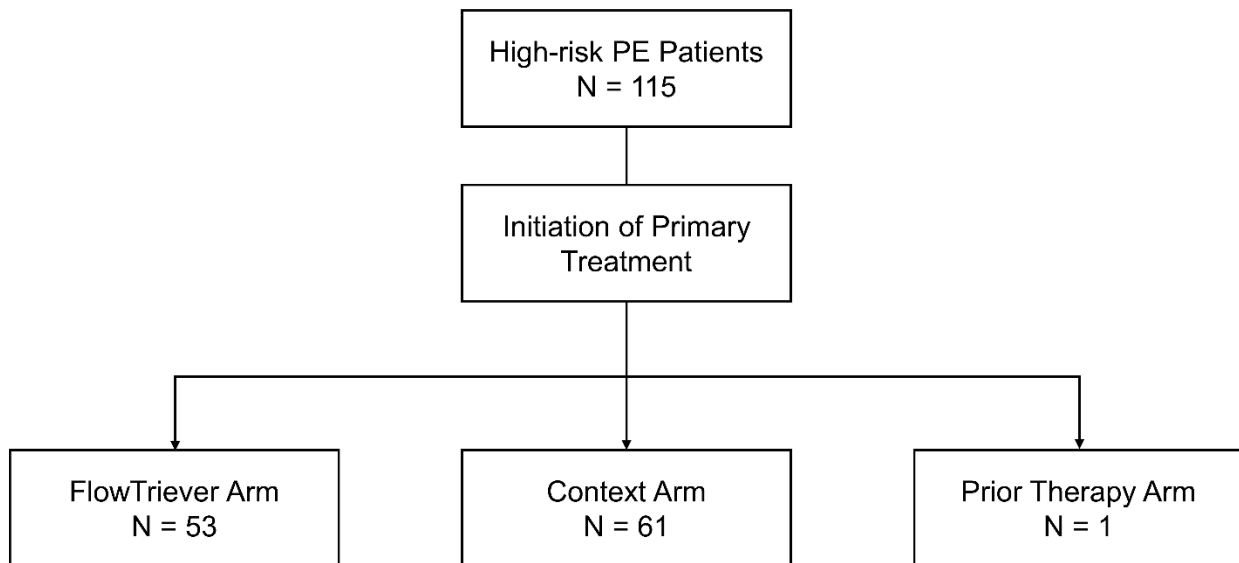

The FLAME study is a prospective, non-randomized, parallel group, observational study. High-risk pulmonary embolism (PE) patients were enrolled concurrently into 1 of 3 parallel registries (FlowTriever Arm, Context Arm, or Prior Therapy Arm) based on physician selection of the primary treatment approach.

### 2.3 Prior Therapy Arm

One patient was enrolled in the Prior Therapy Arm who was initially treated for a non-high-risk PE with anticoagulation, systemic thrombolytics, and catheter-directed thrombolysis with the EkoSonic Endovascular System (Boston Scientific, Maple Grove, MN). The patient deteriorated later the same day, becoming high-risk, and was treated with the FlowTriever System as the primary treatment for the high-

risk PE. The patient subsequently developed hypotension and septic shock and expired 3 days post-procedure.

#### 2.4 All-cause Mortality Stratified by SCAI Shock Stage

**Table S6. All-cause Mortality Stratified by SCAI Shock Stage: FlowTriever Arm**

| SCAI Shock Stage          | FlowTriever Arm<br>(n = 53) |
|---------------------------|-----------------------------|
| A                         | 0/2 (0%)                    |
| B                         | 1/11 (9.1%)                 |
| C                         | 0/29 (0%)                   |
| D                         | 0/5 (0%)                    |
| E                         | 0/6 (0%)                    |
| Total all-cause mortality | 1/53 (1.9%)                 |

SCAI, Society for Cardiovascular Angiography and Interventions.

**Table S7. All-cause Mortality Stratified by SCAI Shock Stage: Context Arm**

| SCAI Shock Stage          | Context Arm<br>(n = 61) |
|---------------------------|-------------------------|
| A                         | 0/1 (0%)                |
| B                         | 1/6 (16.7%)             |
| C                         | 2/22 (9.1%)             |
| D                         | 5/12 (41.7%)            |
| E                         | 10/20 (50.0%)           |
| Total all-cause mortality | 18/61 (29.5%)           |

SCAI, Society for Cardiovascular Angiography and Interventions.

## 2.5 Additional Secondary Endpoints and Serious Adverse Event Incidence

**Table S8. Additional Secondary Endpoints and Serious Adverse Event Incidence: FlowTrierer Arm**

| Additional Secondary Safety Endpoints                                            | FlowTrierer Arm<br>(n = 53)           |
|----------------------------------------------------------------------------------|---------------------------------------|
| Stroke                                                                           | 1 (1.9%), (0.0%-10.1%)                |
| Ischemic                                                                         | 1                                     |
| Hemorrhagic                                                                      | 0                                     |
| Subjects with device-related complication*                                       | 12 (22.6%), (12.3%-36.2%)             |
| Related to primary treatment device/therapy <sup>†,‡</sup>                       | 12                                    |
| Related to bailout                                                               | 1                                     |
| Related to ECMO only                                                             | 0                                     |
| Subjects with access site injury requiring intervention <sup>†</sup>             | 4 (7.5%), (2.1%-18.2%)                |
| <b>Serious Adverse Events</b>                                                    |                                       |
| Subjects with Serious Adverse Events (SAEs)                                      | 16 (30.2%)                            |
| Subjects with SAEs related to primary treatment device or therapy <sup>†,‡</sup> | 10 (18.9%)                            |
| Related to thrombolytic therapy                                                  | 0 (0.0%)                              |
| Related to ECMO only                                                             | 0 (0.0%)                              |
| Subjects with SAEs related to subsequent bailout therapy                         | 1 (1.9%)                              |
| <b>Utility Measures</b>                                                          |                                       |
| Length of post-treatment hospital stay, nights <sup>§</sup>                      | 7.0 [3.0-12.5], (7.5-14.3),<br>n = 52 |
| Length of post-treatment ICU stay, nights <sup>§</sup>                           | 2.0 [1.0-4.0], (2.9-8.1),<br>n = 52   |
| ECMO use                                                                         | 3 (5.7%), (1.2%-15.7%)                |
| Time to extubation, days <sup>§,  </sup>                                         | 1.6 [1.2-4.3],<br>n = 4               |
| Discharge location                                                               |                                       |
| Expired prior to discharge                                                       | 1 (1.9%), (0.0%-10.1%)                |
| Home                                                                             | 26 (49.1%), (35.1%-63.2%)             |
| Home with home healthcare                                                        | 6 (11.3%), (4.3%-23.0%)               |
| Care facility or skilled nursing home                                            | 13 (24.5%), (13.8%-38.3%)             |
| Not discharged (in hospital ≥45 days)                                            | 4 (7.5%), (2.1%-18.2%)                |
| Other                                                                            | 3 (5.7%), (1.2%-15.7%)                |

Values are n (%), (95% Confidence Interval) or median [IQR], (95% Confidence Interval). SAEs and secondary safety endpoints were adjudicated by an independent Clinical Events Committee. ECMO, extracorporeal membrane oxygenation; ICU, intensive care unit; SAE, serious adverse event. Denominator is 53 for the FlowTrierer Arm unless otherwise noted.

\*Device-related complications included primary treatment devices, bailout devices, and ECMO if it was part of the primary treatment strategy. A subject could have more than 1 device-related complication.

<sup>†</sup>One patient with a hemoglobin decrease adjudicated as related to FlowTrierer had a pericardial drain placed and a failed PCI prior to the thrombectomy procedure. One patient with anemia adjudicated as related to FlowTrierer had a high baseline hemoglobin likely due to hemoconcentration and a low follow-up reading noted by the site to be likely due to lab error, but no overt bleeding. One patient with a vascular access site hemorrhage adjudicated as related to FlowTrierer was treated with 10 minutes of manual pressure without further intervention.

<sup>‡</sup>One patient with a vascular access site hemorrhage adjudicated as related to FlowTrierer was treated with manual pressure without further intervention. One patient with a vascular access site hematoma adjudicated as related to FlowTrierer was treated with manual pressure and a femoral compression system without further intervention.

<sup>§</sup>Assessed in patients who survived to discharge or study exit.

||Assessed in patients who were intubated prior to initiation of primary treatment and who were extubated prior to discharge or study exit.

**Table S9. Additional Secondary Endpoints and Serious Adverse Event Incidence: Context Arm**

| <b>Additional Secondary Safety Endpoints</b>                      | <b>Context Arm<br/>(n = 61)</b>       |
|-------------------------------------------------------------------|---------------------------------------|
| Stroke                                                            | 4 (6.6%), (1.8%-15.9%)                |
| Ischemic                                                          | 2                                     |
| Hemorrhagic                                                       | 2                                     |
| Subjects with device-related complication*                        | 10 (16.4%), (8.2%-28.1%)              |
| Related to primary treatment device/therapy                       | 9                                     |
| Related to bailout                                                | 7                                     |
| Related to ECMO only                                              | 3                                     |
| Subjects with access site injury requiring intervention†          | 5 (8.2%), (2.7%-18.1%)                |
| <b>Serious Adverse Events</b>                                     |                                       |
| Subjects with Serious Adverse Events (SAEs)                       | 37 (60.7%)                            |
| Subjects with SAEs related to primary treatment device or therapy | 23 (37.7%)                            |
| Related to thrombolytic therapy                                   | 17 (27.9%)                            |
| Related to ECMO only                                              | 1 (4.3%)                              |
| Subjects with SAEs related to subsequent bailout therapy          | 6 (9.8%)                              |
| <b>Utility Measures</b>                                           |                                       |
| Length of post-treatment hospital stay, nights‡                   | 8.0 [6.0-15.0], (9.0-14.2),<br>n = 43 |
| Length of post-treatment ICU stay, nights‡                        | 3.0 [1.0-7.0], (3.4-7.2),<br>n = 43   |
| ECMO use                                                          | 7 (11.5%), (4.7%-22.2%)               |
| Time to extubation, days†‡                                        | 1.8 [1.5-3.1],<br>n = 6               |
| Discharge location                                                |                                       |
| Expired prior to discharge                                        | 18 (29.5%), (18.5%-42.6%)             |
| Home                                                              | 23 (37.7%), (25.6%-51.0%)             |
| Home with home healthcare                                         | 3 (4.9%), (1.0%-13.7%)                |
| Care facility or skilled nursing home                             | 11 (18.0%), (9.4%-30.0%)              |
| Not discharged (in hospital ≥45 days)                             | 0 (0%), --                            |
| Other                                                             | 6 (9.8%), (3.7%-20.2%)                |

Values are n (%) or median [IQR]. SAEs and secondary safety endpoints were adjudicated by an independent Clinical Events Committee. ECMO, extracorporeal membrane oxygenation; SAE, serious adverse event. Denominator is 61 for the Context Arm unless otherwise noted. ECMO, extracorporeal membrane oxygenation; ICU, intensive care unit.

\*Device-related complications included primary treatment devices, bailout devices, and ECMO if it was part of the primary treatment strategy. A subject could have more than 1 device-related complication.

†Assessed in patients who were intubated prior to initiation of primary treatment and who were extubated prior to discharge or study exit.

‡Assessed in patients who survived to discharge or study exit.

## 2.6 Most Common Device-related Complications

**Table S10. Most Common Device-related Complications: FlowTrievers Arm**

| <b>Complication</b>                      | <b>FlowTrievers Arm<br/>(n = 53)</b> |
|------------------------------------------|--------------------------------------|
| Hemoglobin decrease or anemia*           | 8                                    |
| Vascular access site hemorrhage/hematoma | 4                                    |

Complications occurring in more than 1 patient.

\*6/8 (75%) of the complications related to hemoglobin decrease or anemia occurred in patients whose procedures did not include use of the FlowSaver blood return device.

**Table S11. Most Common Device-related Complications: Context Arm**

| <b>Complication</b>                      | <b>Context Arm<br/>(n=61)</b> |
|------------------------------------------|-------------------------------|
| Vascular access site hemorrhage/hematoma | 4                             |
| Hemoglobin decrease or anemia            | 3                             |
| Hypotension                              | 3                             |

Complications occurring in more than 1 patient.

## 2.7 Listing of Serious Adverse Events Related to the Primary Treatment Device or Therapy

Serious adverse events were defined as fatal or life-threatening, resulting in persistent or significant disability or incapacity, resulted in permanent impairment of a body function or permanent damage to a body structure, resulted in hospitalization or prolonged a hospitalization, or necessitated medical or surgical intervention to preclude permanent impairment of a body function or permanent damage to a body structure. Serious adverse events were adjudicated by the CEC for severity and relatedness to the primary treatment device or therapy or subsequent bailout therapy.

**Table S12. Listing of Serious Adverse Events Related to the Primary Treatment Device or Therapy: FlowTrieve<sup>®</sup> Arm**

| Serious Adverse Event Term      | FlowTrieve <sup>®</sup> Arm*<br>(n = 53) |
|---------------------------------|------------------------------------------|
| Anemia                          | 3                                        |
| Anemia postoperative            | 1                                        |
| Arterial hemorrhage             | 1                                        |
| Arterial repair                 | 1 <sup>†</sup>                           |
| Hemoglobin decreased            | 3                                        |
| Hypotension                     | 1                                        |
| Obstructive shock               | 1                                        |
| Right ventricular failure       | 1                                        |
| Swelling                        | 1                                        |
| Vascular access site hematoma   | 1                                        |
| Vascular access site hemorrhage | 1                                        |

Serious adverse event terms follow Medical Dictionary for Regulatory Activities (MedDRA) terminology.

\*All FlowTrieve<sup>®</sup> Arm serious adverse events were also reported as device-related complications. One patient with a hemoglobin decrease adjudicated as related to FlowTrieve<sup>®</sup> had a pericardial drain placed and a failed PCI prior to the thrombectomy procedure. One patient with anemia adjudicated as related to FlowTrieve<sup>®</sup> had a high baseline hemoglobin likely due to hemoconcentration and a low follow-up reading noted by the site to be likely due to lab error, but no overt bleeding. One patient with a vascular access site hemorrhage adjudicated as related to FlowTrieve<sup>®</sup> was treated with 10 minutes of manual pressure without further intervention. One patient with a vascular access site hematoma adjudicated as related to FlowTrieve<sup>®</sup> was treated with manual pressure and a femoral compression system without further intervention.

<sup>†</sup>Related to extracorporeal membrane oxygenation use.

**Table S13. Listing of Serious Adverse Events Related to the Primary Treatment Device or Therapy: Context Arm**

| <b>Serious Adverse Event Term</b> | <b>Context Arm<br/>(n = 61)</b> |
|-----------------------------------|---------------------------------|
| Acute kidney injury               | 1                               |
| Acute respiratory failure         | 1                               |
| Anemia                            | 4                               |
| Arterial occlusive disease        | 1*                              |
| Breast hematoma                   | 1                               |
| Cardio-respiratory arrest         | 1                               |
| Chest wall hematoma               | 1                               |
| Gastrointestinal hemorrhage       | 1                               |
| Hematoma                          | 3                               |
| Hematuria                         | 1                               |
| Hemodynamic instability           | 1                               |
| Hemoglobin decreased              | 3                               |
| Hemorrhage                        | 1                               |
| Hemorrhage intracranial           | 1                               |
| Hypotension                       | 2                               |
| Orbital hematoma                  | 1                               |
| Peripheral ischemia               | 1                               |
| Pharyngeal hemorrhage             | 1                               |
| Pulmonary embolism                | 1                               |
| Pulmonary hemorrhage              | 1                               |
| Pulseless electrical activity     | 1                               |
| Shock hemorrhagic                 | 2                               |
| Subdural hemorrhage               | 1                               |
| Thrombosis                        | 1                               |
| Tooth socket hemorrhage           | 1                               |
| Vascular access site hematoma     | 1                               |
| Vascular access site hemorrhage   | 4                               |

Serious adverse event terms follow Medical Dictionary for Regulatory Activities (MedDRA) terminology.

\*Related to extracorporeal membrane oxygenation use.
